# Supplementary material for: Kinetic study of azobenzene E/Z isomerization using ion mobility-mass spectrometry and liquid chromatography-UV detection
Source: Royal Society of Chemistry journal article supplement (doi:10.1039/d0an00048e), 2020-01-01

# Kinetic study of azobenzene *E/Z* isomerization using ion mobility-mass spectrometry and liquid chromatography-UV detection.

Salomé Poyer<sup>1,2\*</sup>, Chang Min Choi<sup>3</sup>, Claire Deo<sup>4</sup>, Nicolas Bogliotti<sup>4</sup>, Juan Xie<sup>4</sup>, Philippe Dugourd<sup>5</sup>, Fabien Chiro<sup>6</sup>, Jean-Yves Salpin.<sup>1,2\*</sup>

<sup>1</sup> Université Paris-Saclay, Univ Evry, CNRS, LAMBE, Evry-Courcouronnes, 91025, France

<sup>2</sup> CY Cergy Paris Université, CNRS, LAMBE, 95000, Cergy, France

<sup>3</sup> Center for Scientific Instrumentation, Korea Basic Science Institute, Chungbuk, Republic of Korea

<sup>4</sup> Université Paris-Saclay, ENS Paris-Saclay, CNRS, PPSM, 94235 Cachan, France

<sup>5</sup> Univ Lyon, Université Claude Bernard Lyon 1, CNRS, UMR5306 Institut Lumière Matière, 69622 Villeurbanne, France

<sup>6</sup> Univ Lyon, Université Claude Bernard Lyon 1, CNRS, ENS de Lyon, UMR5280 Institut des Sciences Analytiques, 69622 Villeurbanne, France

## Supporting information

|                                                                                                                                                                                                                                                       |   |
|-------------------------------------------------------------------------------------------------------------------------------------------------------------------------------------------------------------------------------------------------------|---|
| Complete citation for the Gaussian code of programs .....                                                                                                                                                                                             | 3 |
| Table S1. Nature of the complexes observed with azobenzene under electrospray conditions, in function of the ionizing agent. ....                                                                                                                     | 4 |
| Figure S1. CID MS/MS spectra observed for a) $[Z2+H]^+$ , b) $[E+H]^+$ and c) $[ZI+H]^+$ . ....                                                                                                                                                       | 5 |
| Figure S2. MS spectra observed for a) <i>Z2</i> , b) <i>E</i> and c) <i>ZI</i> after HPLC separation and silver complexation. To generate $[M+Ag]^+$ and $[2M+Ag]^+$ ions, 10 $\mu$ M of $AgNO_3$ were added to the aqueous mobile phase.....         | 5 |
| Figure S3. CID MS/MS spectra observed for a) $[Z2+Ag]^+$ , b) $[E+Ag]^+$ and c) $[ZI+Ag]^+$ . ....                                                                                                                                                    | 6 |
| Figure S4. MS spectra observed for a) <i>Z2</i> , b) <i>E</i> and c) <i>ZI</i> after HPLC separation and calcium complexation. To generate $[3Z+Ca]^{2+}$ and $[4Z+Ca]^{2+}$ ions, 10 $\mu$ M of $CaCl_2$ were added to the aqueous mobile phase..... | 6 |
| Figure S5. MS spectra observed for a) <i>Z2</i> , b) <i>E</i> and c) <i>ZI</i> after HPLC separation and zinc complexation. To generate Zn complex ions, 100 $\mu$ M of $ZnSO_4$ were added to the aqueous mobile phase.....                          | 7 |

|                                                                                                                                                                                                                 |    |
|-----------------------------------------------------------------------------------------------------------------------------------------------------------------------------------------------------------------|----|
| Figure S6. MS spectra observed for a) Z2, b) E and c) ZI after HPLC separation and iron complexation. To generate Fe complex ions, 100 $\mu$ M of FeCl <sub>2</sub> were added to the aqueous mobile phase..... | 7  |
| Figure S7. Relative HPLC peak integration area in function of the time used to determine the proportion of E→Z1/Z2 isomers from LC-UV coupling for the different solvents at 30°C.....                          | 8  |
| Figure S8. Relative HPLC peak integration area in function of the time used to determine the proportion of E→Z1/Z2 isomers from LC-UV coupling for the different solvents at 40°C.....                          | 9  |
| Figure S9. Plots ln[E] in function of the time from LC-UV experiments at 30°C.....                                                                                                                              | 10 |
| Figure S10. Plots ln[E] in function of the time from LC-UV experiments at 40°C.....                                                                                                                             | 11 |
| Figure S11. Extracted arrival time distributions of [M+Ag] <sup>+</sup> at m/z 387.0 obtained from drift tube ion mobility spectrometry after LC separation of a mixture of Z1/Z2/E isomers. ....               | 12 |
| Figure S12. Extracted and fitted arrival time distributions of m/z 387.0 obtained from the first kinetic point of TWIMS-MS experiments at 50°C in different solvents. ....                                      | 12 |
| Figure S13. Structure of the various Ag <sup>+</sup> complexes optimized at the B3LYP/6-31G(d,p) level. Relative energies are given in kJ/mol.....                                                              | 13 |
| Table S2. Experimental and computed IR vibrational bands for the Z1-Ag4 complex.....                                                                                                                            | 14 |
| Table S3. Experimental and computed IR vibrational bands for the Z2-Ag1 complex.....                                                                                                                            | 14 |
| Figure S14. DFT calculated IR absorption spectrum for the optimized structures of the [Z1+Ag] <sup>+</sup> complex.....                                                                                         | 15 |
| Figure S15. DFT calculated IR absorption spectrum for the optimized structures of the [Z1+Ag] <sup>+</sup> complex.....                                                                                         | 16 |
| Table S4. Experimental CCS values obtained from drift tube ion mobility experiments and theoretical CCS values obtained with the TM, PA and EHSS algorithms of the MOBCAL software. ....                        | 16 |
| Figure S16. Plots of intensities ratio of [E+Ag] <sup>+</sup> /[2E+Ag] <sup>+</sup> in function of the time from IMS-MS experiments at 60°C. ....                                                               | 17 |
| Figure S17. Plots ln[E] in function of the time from IMS-MS experiments at 50°C.....                                                                                                                            | 18 |
| Figure S18. Plots ln[E] in function of the time from IMS-MS experiments at 60°C.....                                                                                                                            | 19 |
| Figure S19. Plots ln[E] in function of the time from IMS-MS experiments at 70°C.....                                                                                                                            | 19 |
| Figure S20. Plots ln[E] in function of the time from a) LC-UV and b) IMS-MS experiments at 40°C.....                                                                                                            | 20 |

## **Complete citation for the Gaussian code of programs**

Gaussian 09, Revision C.01,

M. J. Frisch, G. W. Trucks, H. B. Schlegel, G. E. Scuseria, M. A. Robb, J. R. Cheeseman, G. Scalmani, V. Barone, B. Mennucci, G. A. Petersson, H. Nakatsuji, M. Caricato, X. Li, H. P. Hratchian, A. F. Izmaylov, J. Bloino, G. Zheng, J. L. Sonnenberg, M. Hada, M. Ehara, K. Toyota, R. Fukuda, J. Hasegawa, M. Ishida, T. Nakajima, Y. Honda, O. Kitao, H. Nakai, T. Vreven, J. A. Montgomery, Jr., J. E. Peralta, F. Ogliaro, M. Bearpark, J. J. Heyd, E. Brothers, K. N. Kudin, V. N. Staroverov, T. Keith, R. Kobayashi, J. Normand, K. Raghavachari, A. Rendell, J. C. Burant, S. S. Iyengar, J. Tomasi, M. Cossi, N. Rega, J. M. Millam, M. Klene, J. E. Knox, J. B. Cross, V. Bakken, C. Adamo, J. Jaramillo, R. Gomperts, R. E. Stratmann, O. Yazyev, A. J. Austin, R. Cammi, C. Pomelli, J. W. Ochterski, R. L. Martin, K. Morokuma, V. G. Zakrzewski, G. A. Voth, P. Salvador, J. J. Dannenberg, S. Dapprich, A. D. Daniels, O. Farkas, J. B. Foresman, J. V. Ortiz, J. Cioslowski, and D. J. Fox, Gaussian, Inc., Wallingford CT, 2010

**Table S1.** Nature of the complexes observed with azobenzene under electrospray conditions, in function of the ionizing agent.

| <b>Ionizing agent</b>                                                                        | <b>Complex generated onto the ESI-MS spectrum</b>                                                                               |
|----------------------------------------------------------------------------------------------|---------------------------------------------------------------------------------------------------------------------------------|
| H <sup>+</sup>                                                                               | [M+H] <sup>+</sup> , [2M+H] <sup>+</sup>                                                                                        |
| Li <sup>+</sup> , Na <sup>+</sup> , K <sup>+</sup> , Rb <sup>+</sup> , Cs <sup>+</sup>       | [M+Alk] <sup>+</sup> , [2M+Alk] <sup>+</sup>                                                                                    |
| Ca <sup>2+</sup> , Sr <sup>2+</sup> , Mn <sup>2+</sup>                                       | [3M+Cat] <sup>2+</sup> , [4M+Cat] <sup>2+</sup> (M=Z1, Z2)                                                                      |
| Ba <sup>2+</sup>                                                                             | [3M+Ba] <sup>2+</sup> (M=E, Z1, Z2)<br>[4M+Ba] <sup>2+</sup> (M=Z1, Z2)<br>[5M+Ba] <sup>2+</sup> , [6M+Ba] <sup>2+</sup> (M=Z1) |
| Ag <sup>+</sup> , Cu <sup>2+</sup>                                                           | [M+Cat] <sup>+</sup> , [2M+Cat] <sup>+</sup>                                                                                    |
| Ni <sup>2+</sup>                                                                             | [2M+Ni] <sup>2+</sup> , [3M+Ni] <sup>2+</sup> , [4M+Ni] <sup>2+</sup> (M=Z1, Z2)                                                |
| Cd <sup>2+</sup>                                                                             | [2M+Cd] <sup>2+</sup> , [3M+Cd] <sup>2+</sup> , [4Z1+Cd] <sup>2+</sup> (M=Z1, Z2)                                               |
| Fe <sup>2+</sup>                                                                             | [4Z1+Fe] <sup>2+</sup> , [2(E-58)+Fe] <sup>2+</sup> , [3(Z2-58)+Fe] <sup>2+</sup>                                               |
| Co <sup>2+</sup> , Zn <sup>2+</sup>                                                          | [4Z1+Cat] <sup>2+</sup> , [2Z2+Cat] <sup>2+</sup> , [E+Cat] <sup>2+</sup>                                                       |
| Fe <sup>3+</sup> , Ti <sup>3+</sup> , Au <sup>3+</sup> , La <sup>3+</sup> , Eu <sup>3+</sup> | No complexes                                                                                                                    |

**Figure S1.** CID MS/MS spectra observed for a)  $[Z2+H]^+$ , b)  $[E+H]^+$  and c)  $[Z1+H]^+$ .

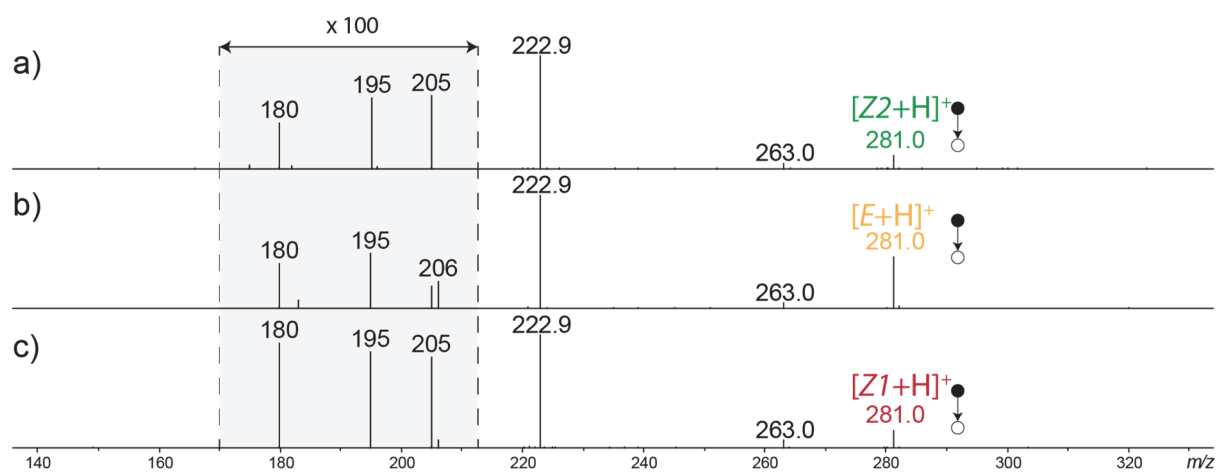

**Figure S2.** MS spectra observed for a)  $Z2$ , b)  $E$  and c)  $Z1$  after HPLC separation and silver complexation. To generate  $[M+Ag]^+$  and  $[2M+Ag]^+$  ions, 10  $\mu\text{M}$  of  $\text{AgNO}_3$  were added to the aqueous mobile phase.

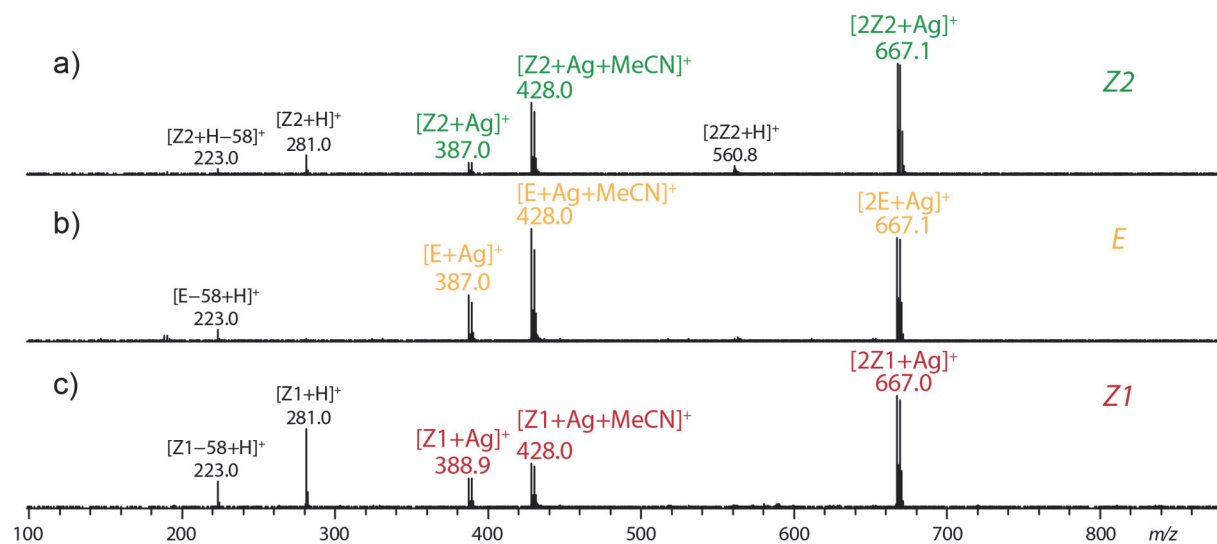

**Figure S3.** CID MS/MS spectra observed for a)  $[Z2+Ag]^+$ , b)  $[E+Ag]^+$  and c)  $[Z1+Ag]^+$ .

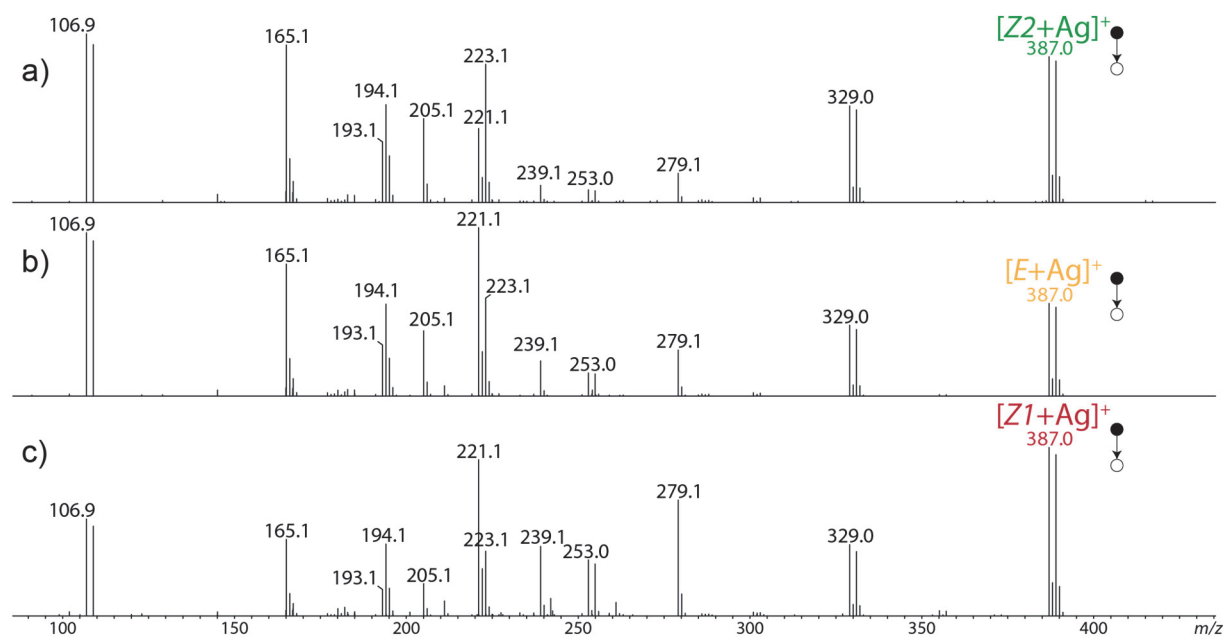

**Figure S4.** MS spectra observed for a)  $Z2$ , b)  $E$  and c)  $Z1$  after HPLC separation and calcium complexation. To generate  $[3Z+Ca]^{2+}$  and  $[4Z+Ca]^{2+}$  ions, 10  $\mu$ M of  $CaCl_2$  were added to the aqueous mobile phase.

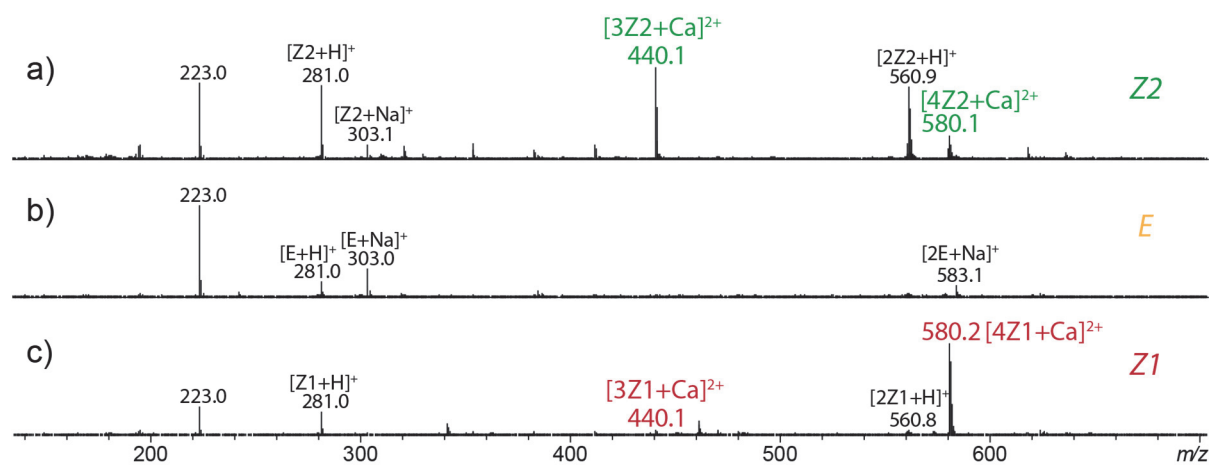

**Figure S5.** MS spectra observed for a) *Z2*, b) *E* and c) *Z1* after HPLC separation and zinc complexation. To generate Zn complex ions, 100  $\mu\text{M}$  of  $\text{ZnSO}_4$  were added to the aqueous mobile phase.

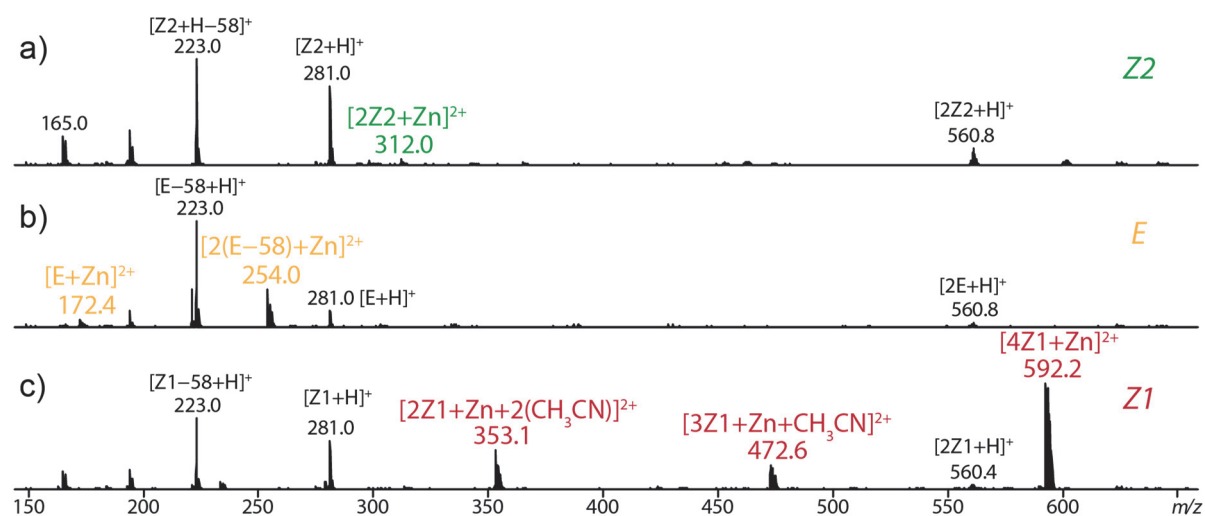

**Figure S6.** MS spectra observed for a) *Z2*, b) *E* and c) *Z1* after HPLC separation and iron complexation. To generate Fe complex ions, 100  $\mu\text{M}$  of  $\text{FeCl}_2$  were added to the aqueous mobile phase.

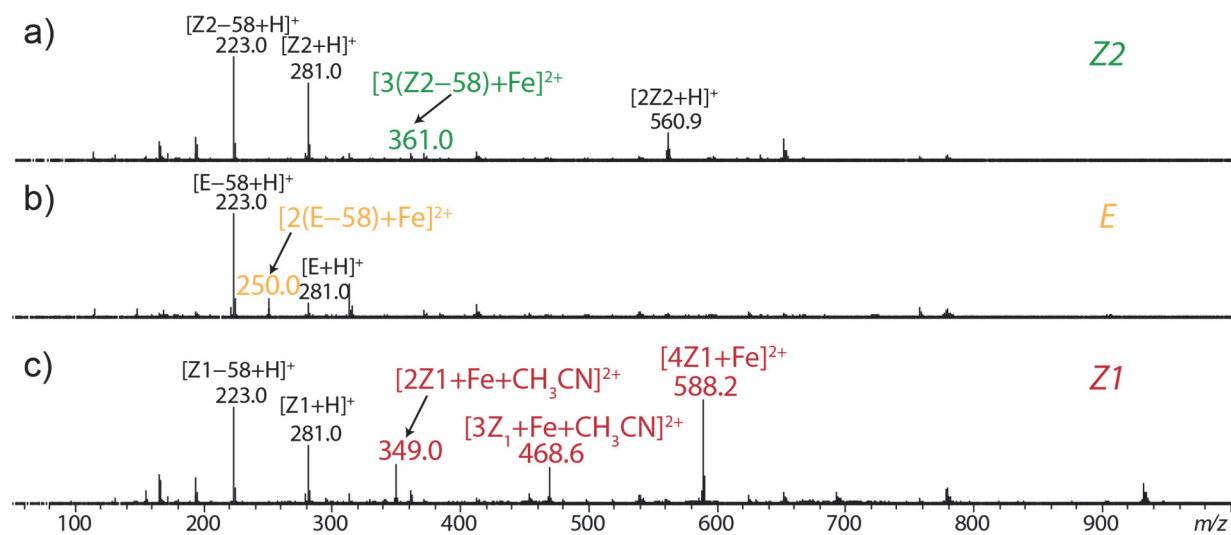

**Figure S7.** Relative HPLC peak integration area in function of the time used to determine the proportion of *E*→*Z1*/*Z2* isomers from LC-UV coupling for the different solvents at 30°C.

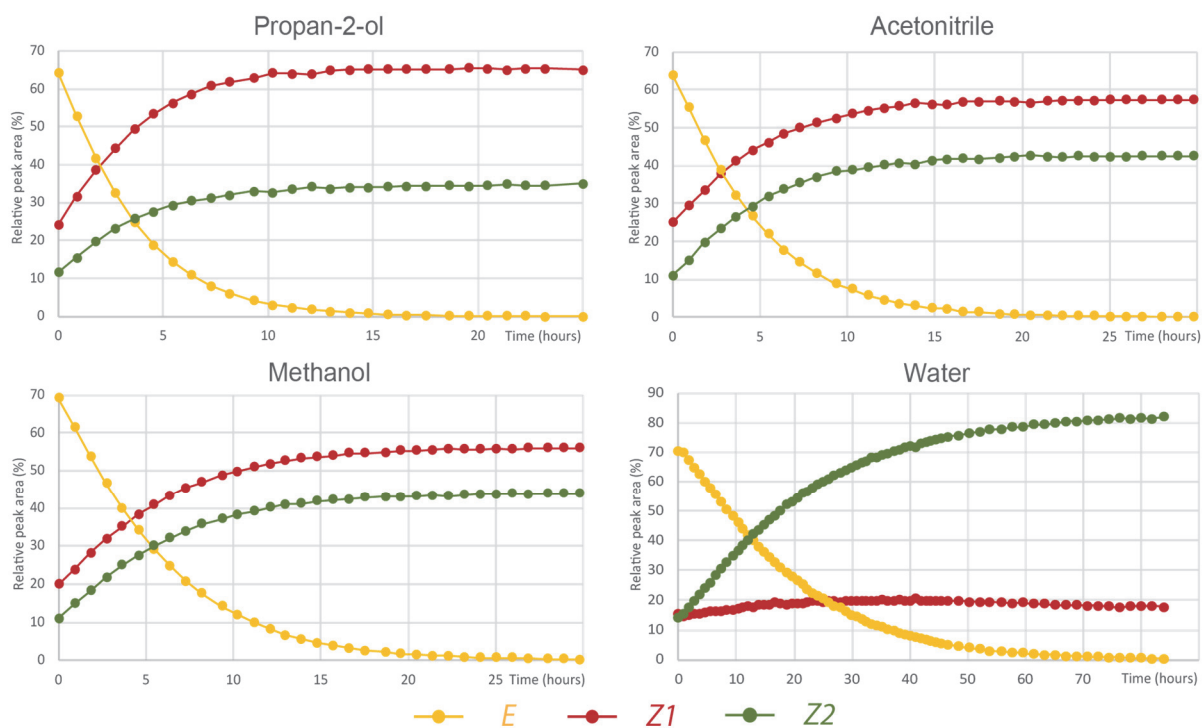



**Figure S8.** Relative HPLC peak integration area in function of the time used to determine the proportion of *E*→*Z1*/*Z2* isomers from LC-UV coupling for the different solvents at 40°C.

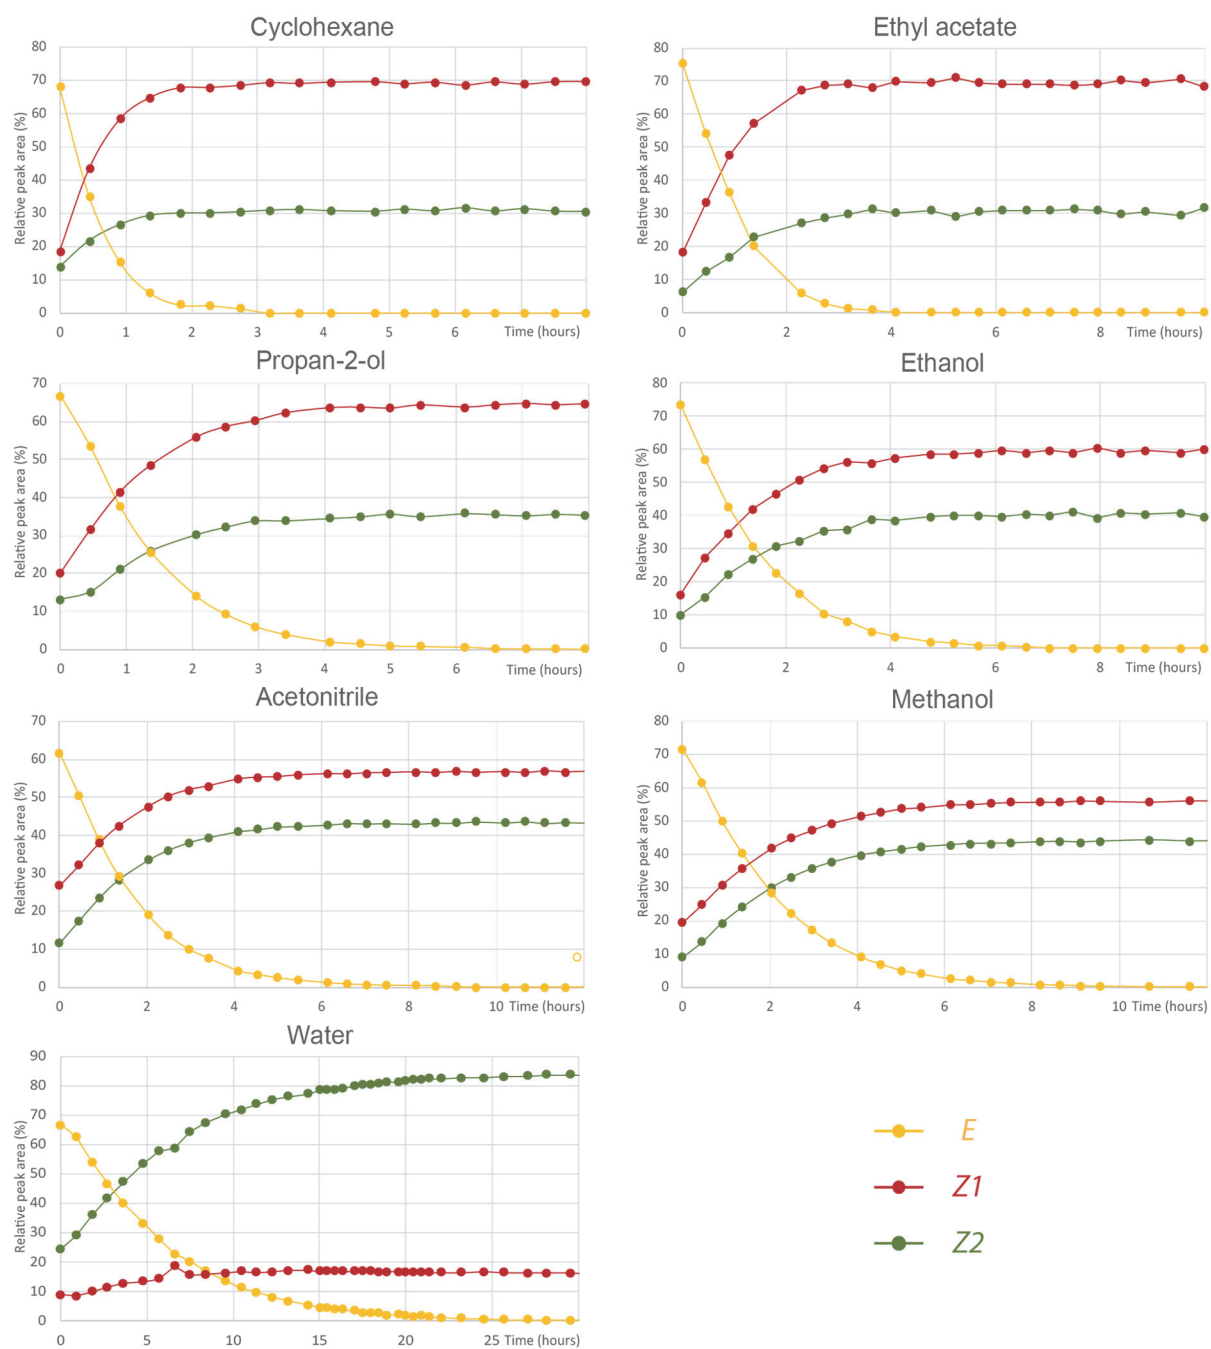

**Figure S9.** Plots  $\ln[E]$  in function of the time from LC-UV experiments at 30°C.

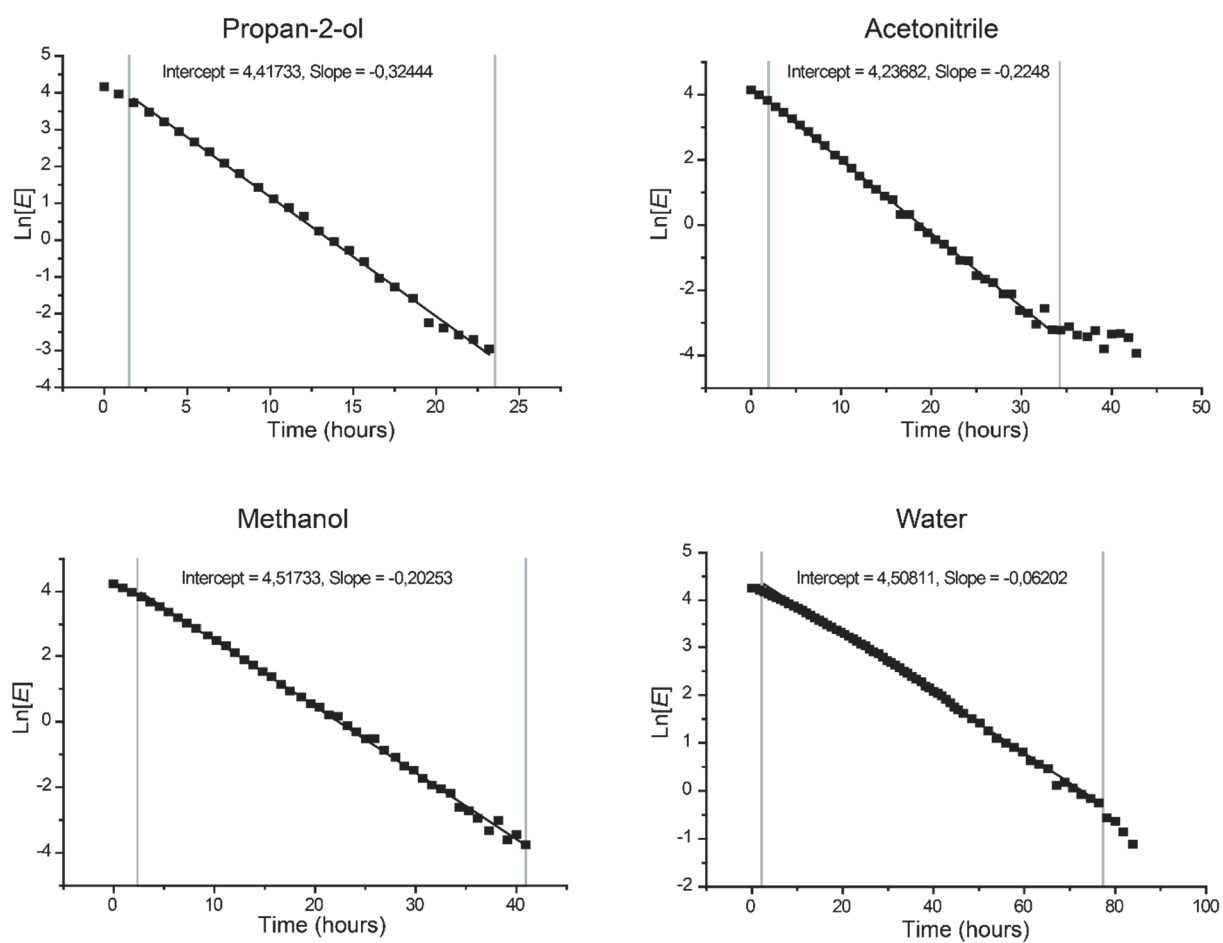

**Figure S10.** Plots  $\ln[E]$  in function of the time from LC-UV experiments at 40°C.

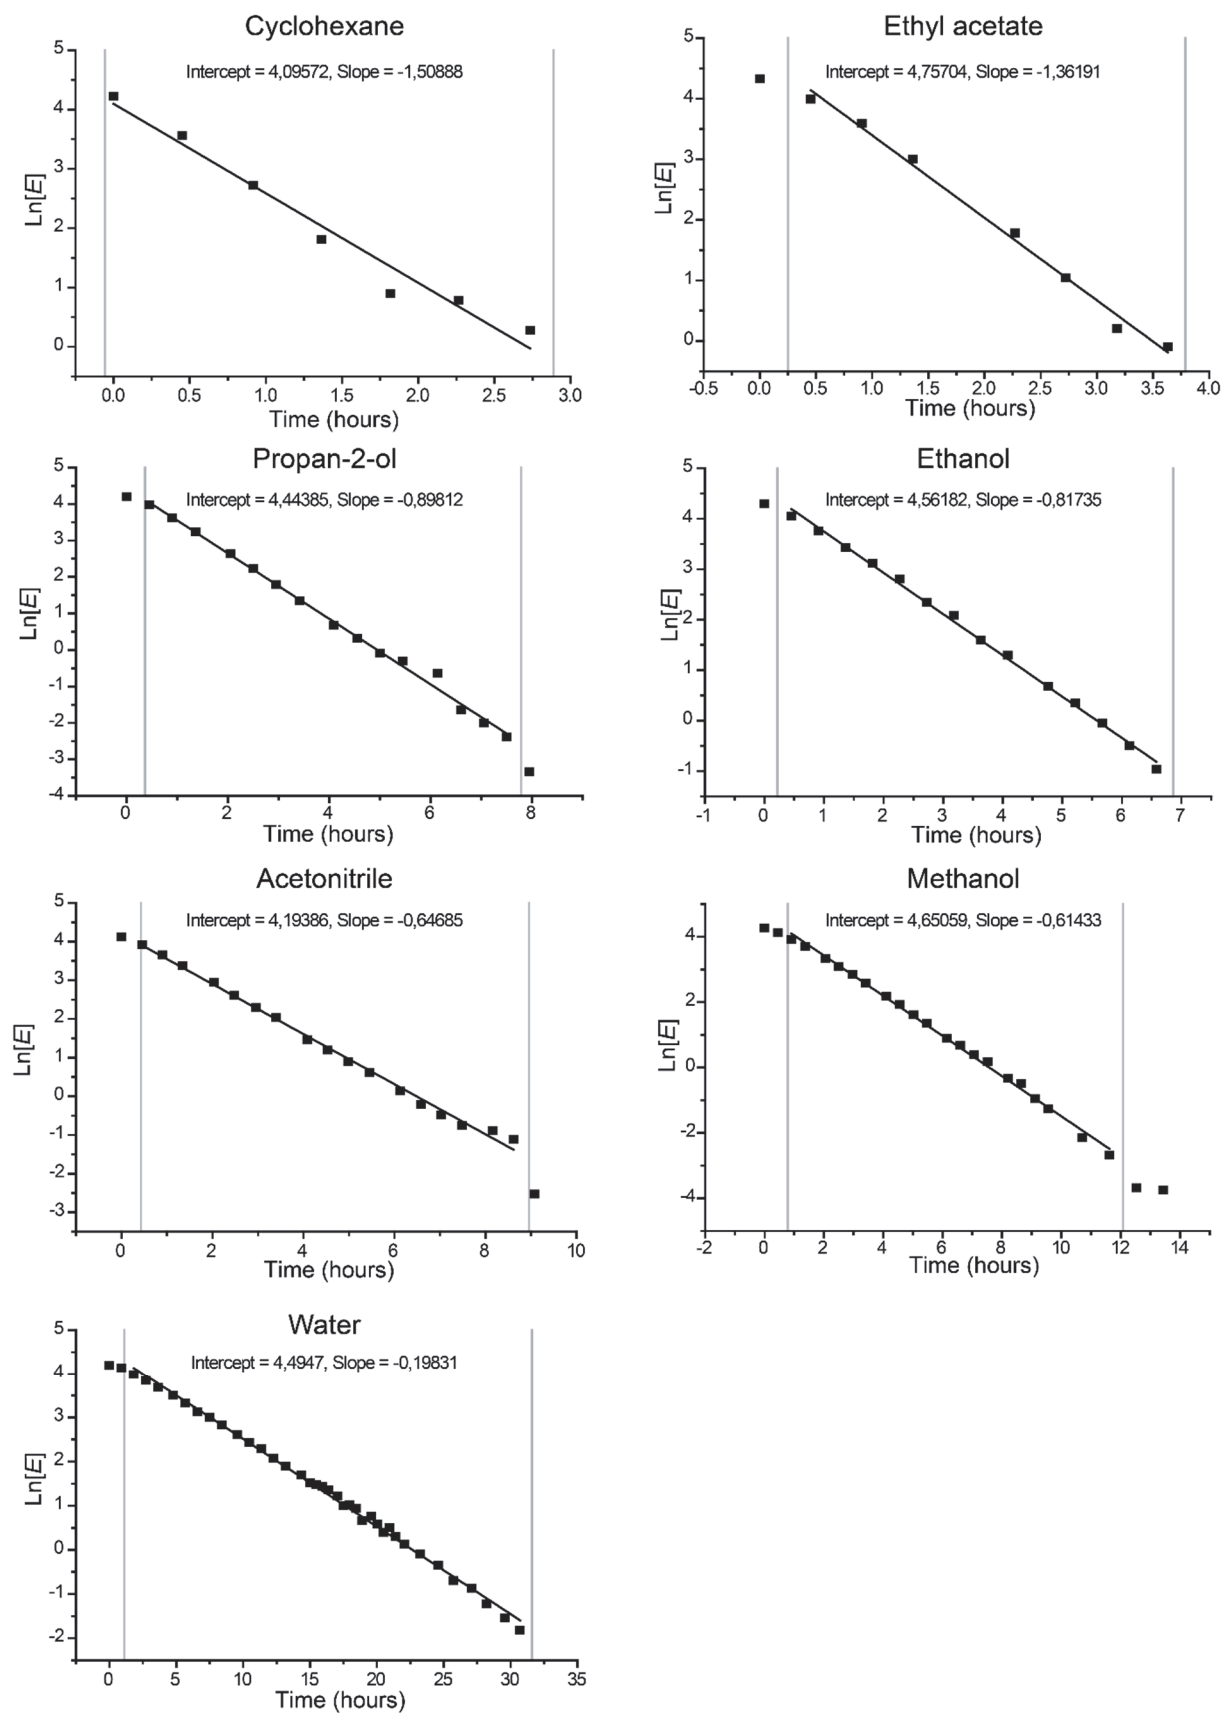

**Figure S11.** Extracted arrival time distributions of  $[M+Ag]^+$  at  $m/z$  387.0 obtained from drift tube ion mobility spectrometry after LC separation of a mixture of *Z1/Z2/E* isomers.

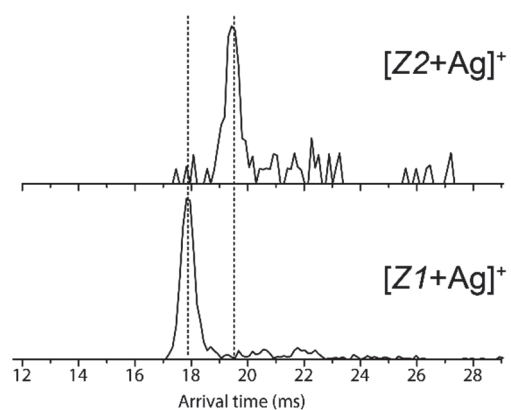

**Figure S12.** Extracted and fitted arrival time distributions of  $m/z$  387.0 obtained from the first kinetic point of TWIMS-MS experiments at 50°C in different solvents.

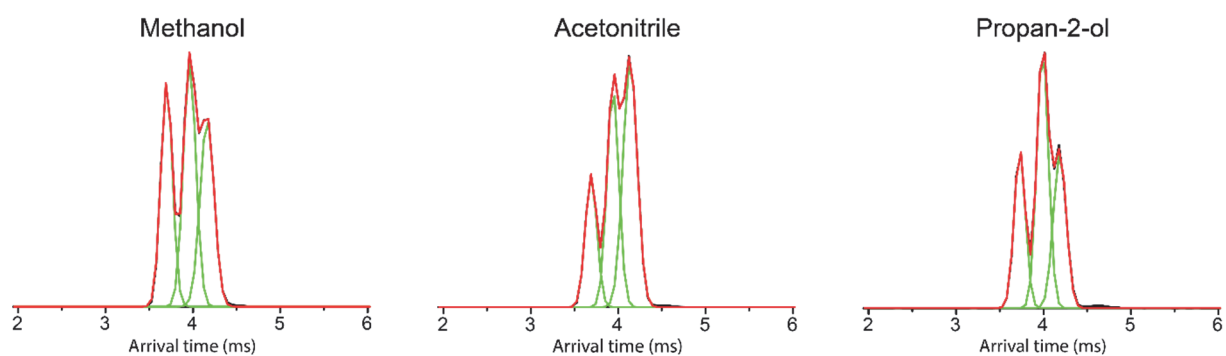

**Figure S13.** Structure of the various  $\text{Ag}^+$  complexes optimized at the B3LYP/6-31G(d,p) level. Relative energies are given in kJ/mol.

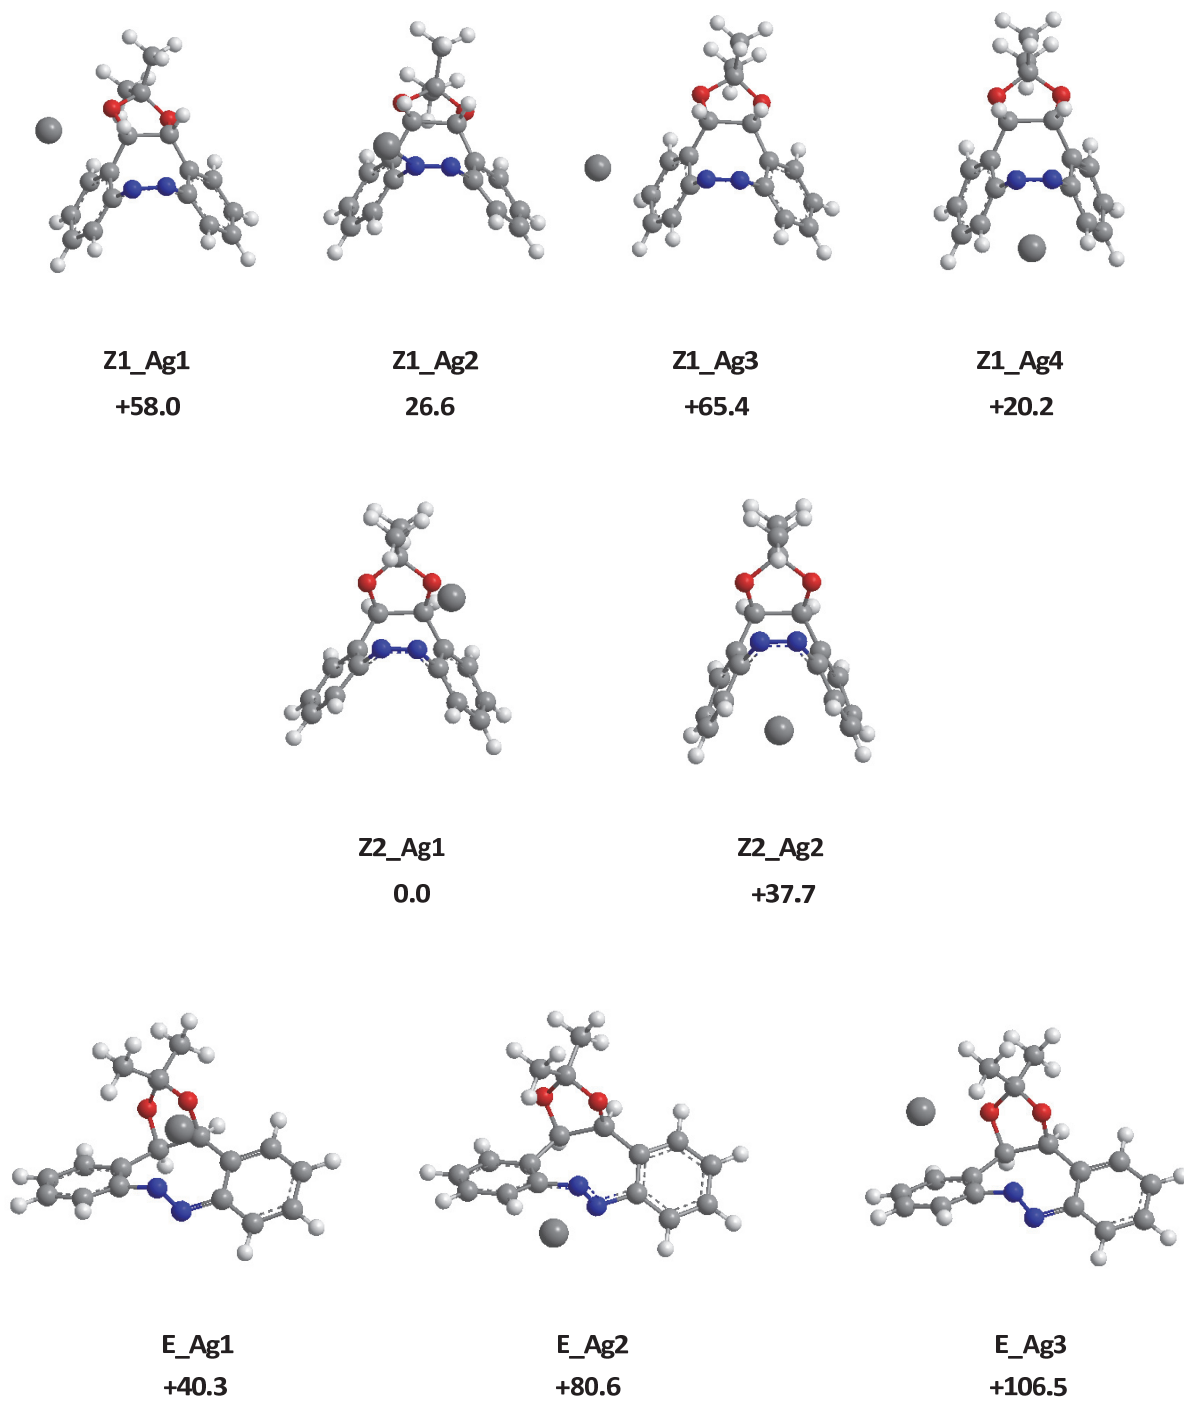

**Table S2.** Experimental and computed IR vibrational bands for the **Z1-Ag4** complex

| Wavenumbers<br>(cm <sup>-1</sup> ) |                    | DFT-computed<br>intensities (km/mol) | Vibrational mode                                   |
|------------------------------------|--------------------|--------------------------------------|----------------------------------------------------|
| Exp.                               | Calc. <sup>a</sup> |                                      |                                                    |
| 780                                | 763                | 102                                  | $\gamma$ CH benzenic                               |
|                                    | 786                | 30                                   | $\gamma$ CH benzenic                               |
| 1042                               | 1045               | 143                                  | arom. ring breath.                                 |
| 1085                               | 1089               | 107                                  | $\nu$ C-O                                          |
| 1137                               | 1149               | 20                                   | $\delta$ C-H aro+ $\delta$ CH <sub>3</sub> wag.    |
| 1180                               | 1195               | 198                                  | $\delta$ CH <sub>2</sub> sciss. of CH <sub>3</sub> |
|                                    | 1218               | 34                                   | $\delta$ CH aliph.                                 |
| 1227                               | 1241               | 58                                   | $\delta$ CH aliph.                                 |
| 1349                               | 1374               | 33                                   | $\delta$ CH <sub>3</sub> umbrella                  |
| 1398                               | 1413               | 21                                   | $\delta$ CH arom.                                  |

a) Scaled by a factor of 0.965

**Table S3.** Experimental and computed IR vibrational bands for the **Z2-Ag1** complex

| Wavenumbers<br>(cm <sup>-1</sup> ) |                    | DFT-computed<br>intensities (km/mol) | Vibrational mode                  |
|------------------------------------|--------------------|--------------------------------------|-----------------------------------|
| Exp.                               | Calc. <sup>a</sup> |                                      |                                   |
| 748                                | 746                | 61                                   | $\gamma$ CH benzenic              |
|                                    | 755                | 32                                   | $\gamma$ CH benzenic              |
| 975                                | 957                | 55                                   | $\gamma$ CH CH <sub>3</sub>       |
| 1025                               | 1019               | 118                                  | $\nu$ C-O                         |
| 1142                               | 1137               | 57                                   | $\delta$ CH <sub>2</sub> rock.    |
| 1200                               | 1190               | 106                                  | $\delta$ CH CH <sub>3</sub>       |
|                                    | 1203               | 75                                   | $\delta$ CH arom.                 |
| 1235                               | 1244               | 40                                   | $\delta$ CH CH <sub>3</sub>       |
| 1365                               | 1364               | 34                                   | $\delta$ CH <sub>3</sub> umbrella |

a) Scaled by a factor of 0.965

**Figure S14.** DFT calculated IR absorption spectrum for the optimized structures of the  $[Zl+Ag]^+$  complex

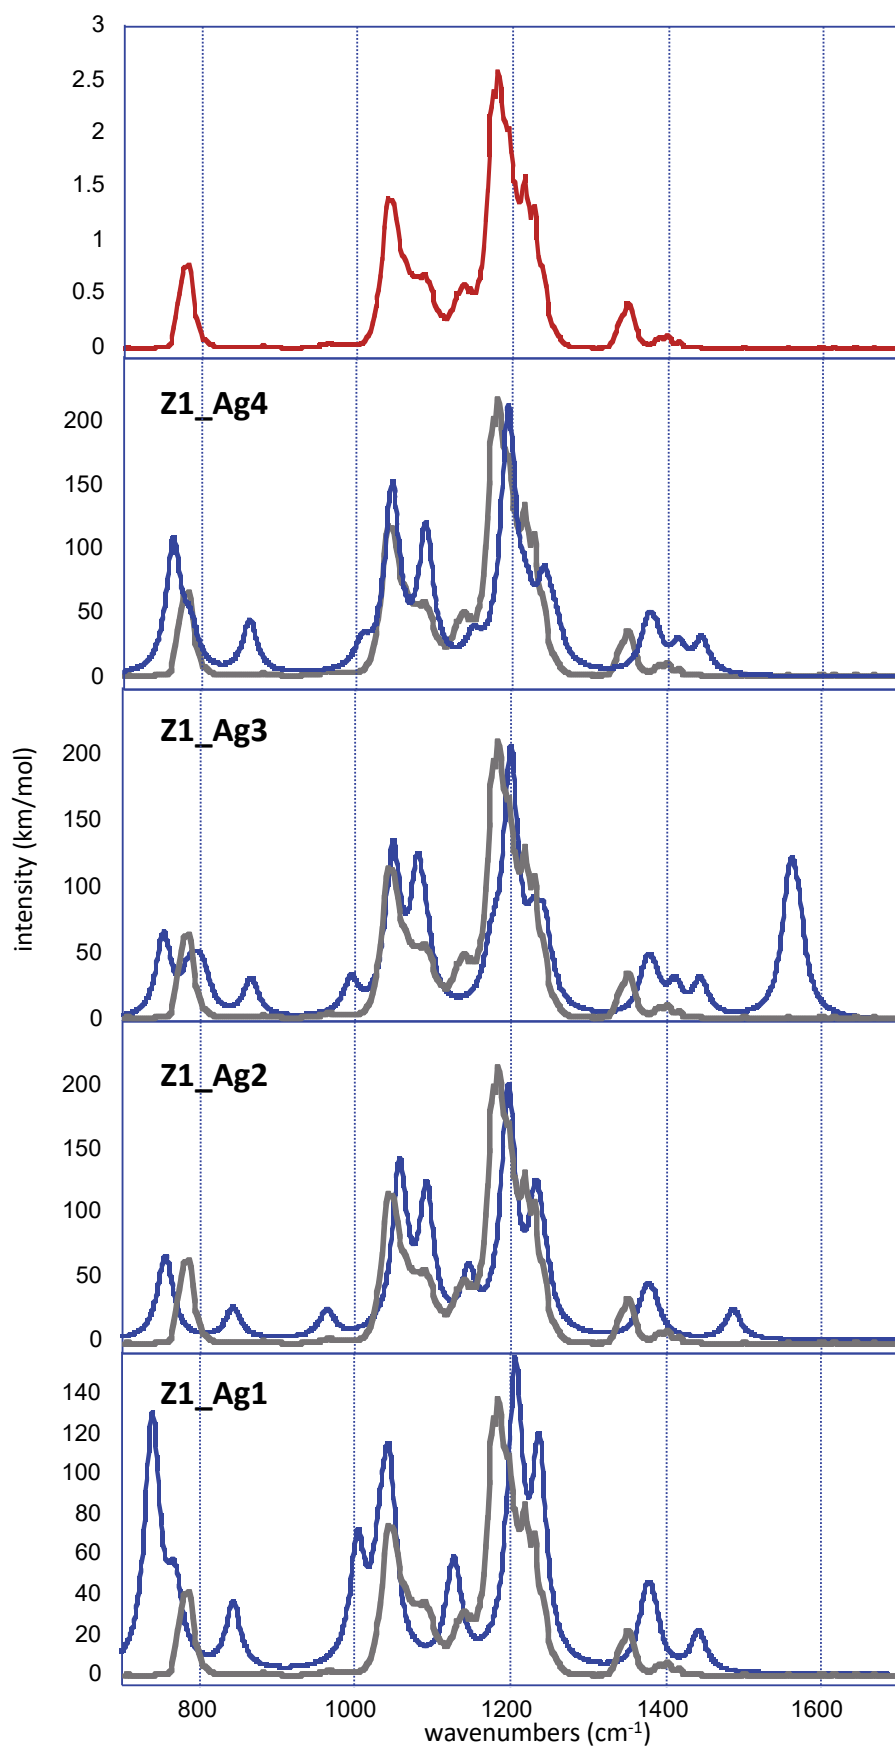

**Figure S15.** DFT calculated IR absorption spectrum for the optimized structures of the  $[Z1+Ag]^+$  complex

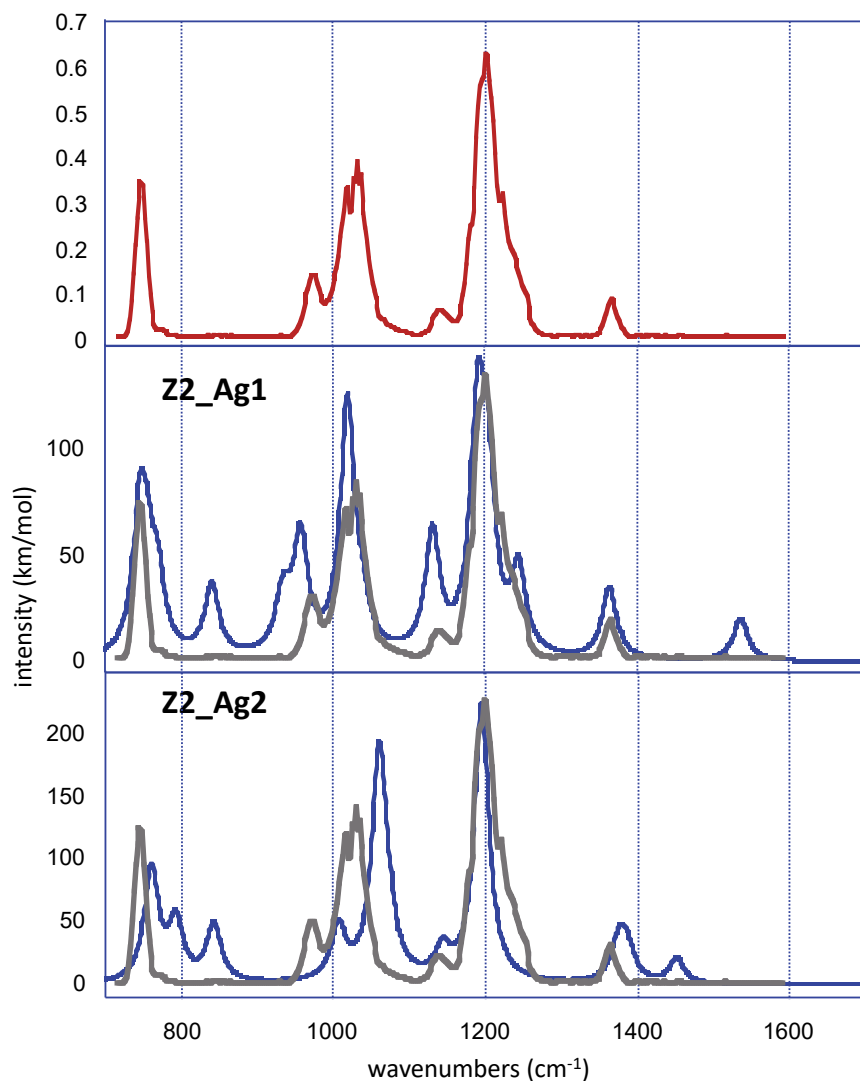

**Table S4.** Experimental CCS values obtained from drift tube ion mobility experiments and theoretical CCS values obtained with the TM, PA and EHSS algorithms of the MOBCAL software.

|                                    | Experimental              | Theoretical                           |                                        |                                        |
|------------------------------------|---------------------------|---------------------------------------|----------------------------------------|----------------------------------------|
|                                    |                           | TM                                    | PA                                     | EHSS                                   |
| <i>Z1</i> ( <i>Z1_Ag1</i> )        | $106 \pm 2 \text{ \AA}^2$ | 101 $\text{\AA}^2$                    | 106.9 $\text{\AA}^2$                   | 115 $\text{\AA}^2$                     |
| <i>Z1</i> ( <i>Z1_Ag2</i> )        |                           | 101.9 $\text{\AA}^2$                  | 112.4 $\text{\AA}^2$                   | 121.3 $\text{\AA}^2$                   |
| <i>Z1</i> ( <i>Z1_Ag3</i> )        |                           | 102.5 $\text{\AA}^2$                  | 110.4 $\text{\AA}^2$                   | 119.4 $\text{\AA}^2$                   |
| <i>Z1</i> ( <b><i>Z1_Ag4</i></b> ) |                           | <b>96.3 <math>\text{\AA}^2</math></b> | <b>101 <math>\text{\AA}^2</math></b>   | <b>107.2 <math>\text{\AA}^2</math></b> |
| <i>Z2</i> ( <b><i>Z2_Ag1</i></b> ) | $115 \pm 2 \text{ \AA}^2$ | <b>97.1 <math>\text{\AA}^2</math></b> | <b>106.4 <math>\text{\AA}^2</math></b> | <b>114.1 <math>\text{\AA}^2</math></b> |
| <i>Z2</i> ( <i>Z2_Ag2</i> )        |                           | 115.0 $\text{\AA}^2$                  | 93.5 $\text{\AA}^2$                    | 100.4 $\text{\AA}^2$                   |



**Figure S16.** Plots of intensities ratio of  $[E+Ag]^+/[2E+Ag]^+$  in function of the time from IMS-MS experiments at 60°C.

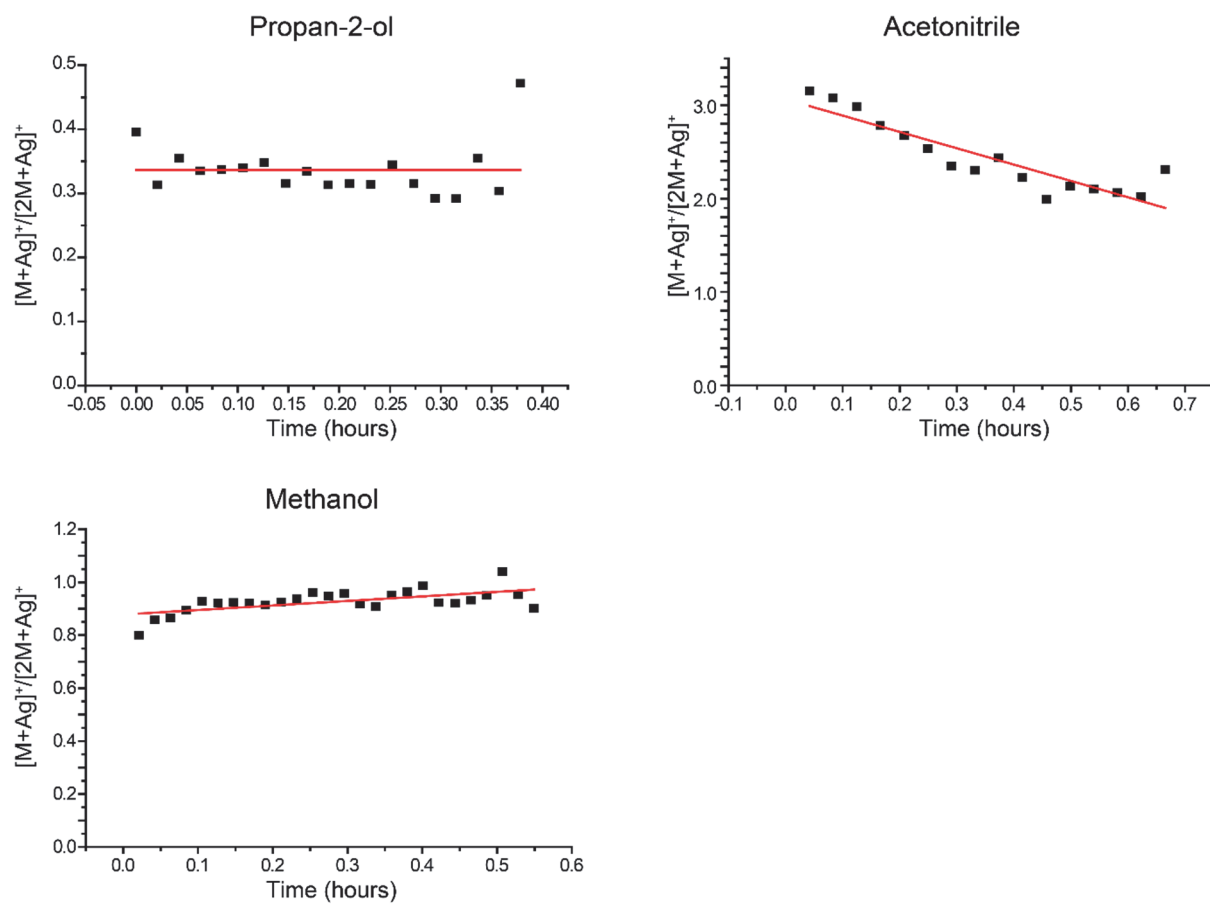

**Figure S17.** Plots  $\ln[E]$  in function of the time from IMS-MS experiments at 50°C.

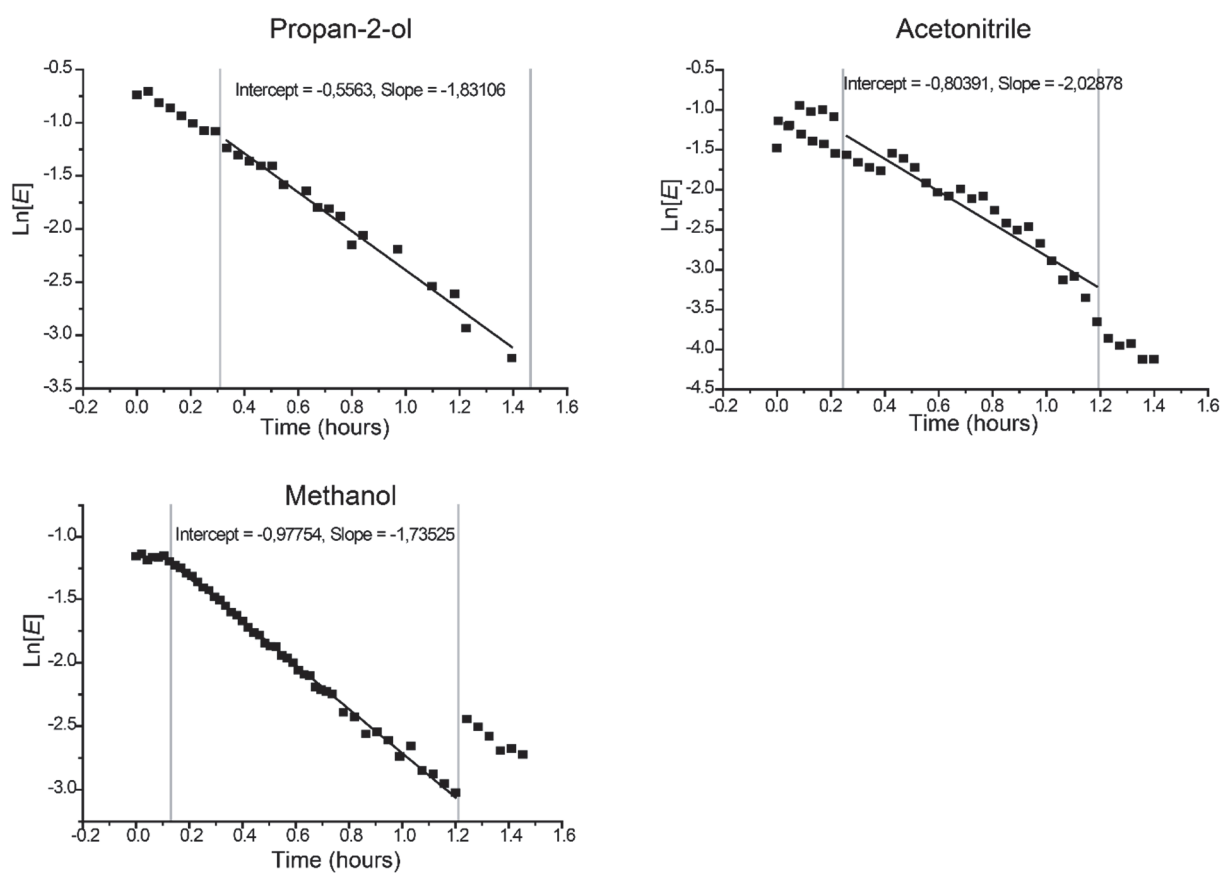

**Figure S18.** Plots  $\ln[E]$  in function of the time from IMS-MS experiments at 60°C.

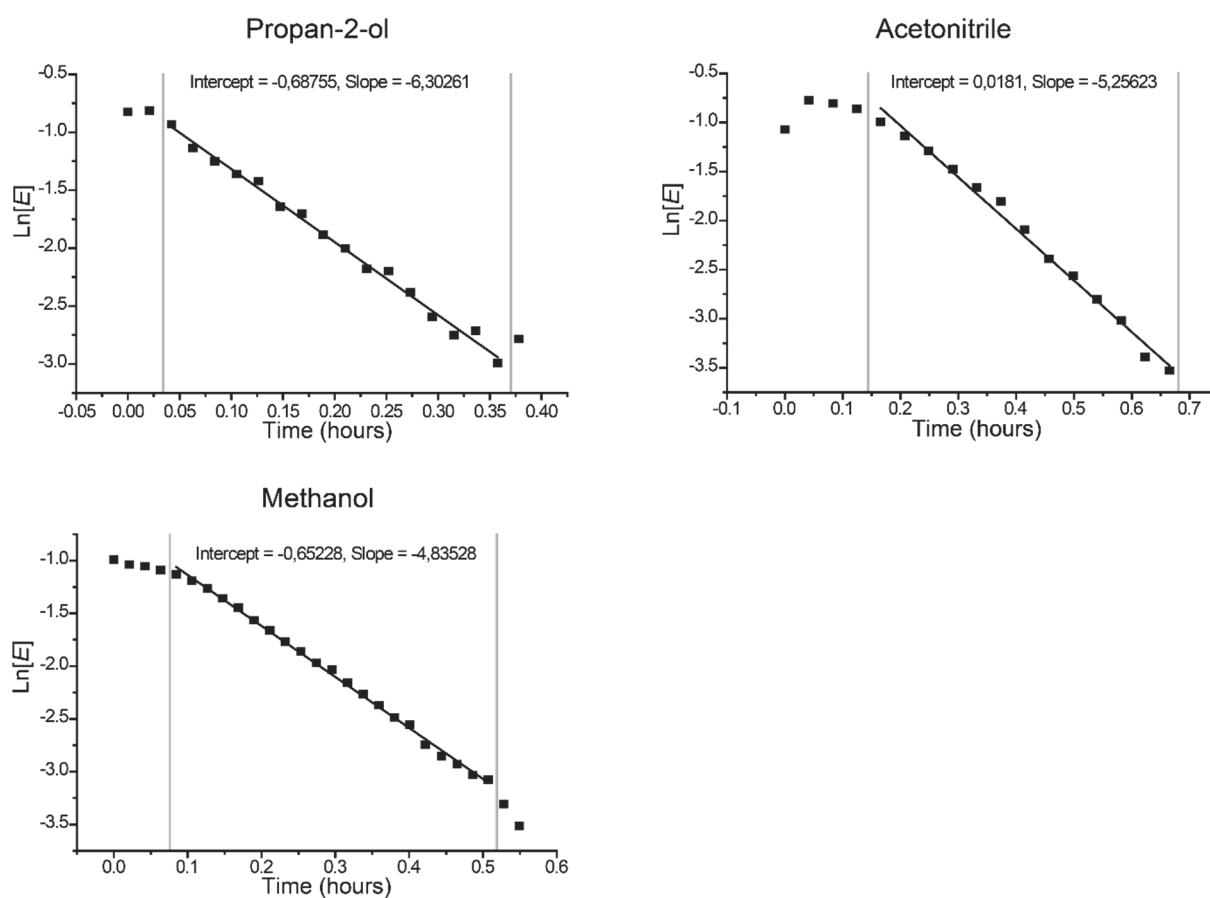

**Figure S19.** Plots  $\ln[E]$  in function of the time from IMS-MS experiments at 70°C.

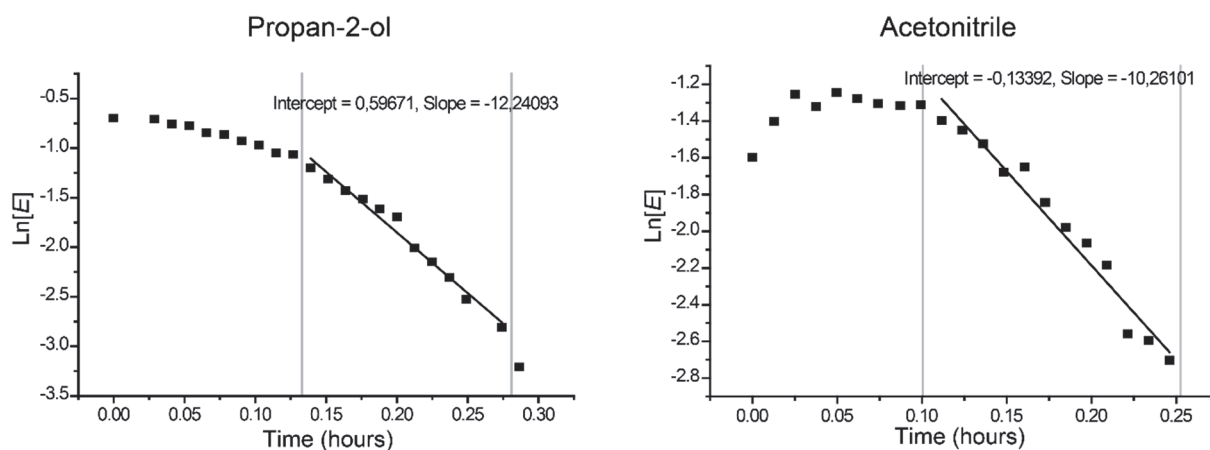

**Figure S20.** Plots  $\ln[E]$  in function of the time from a) LC-UV and b) IMS-MS experiments at 40°C.

a) LC-UV experiments

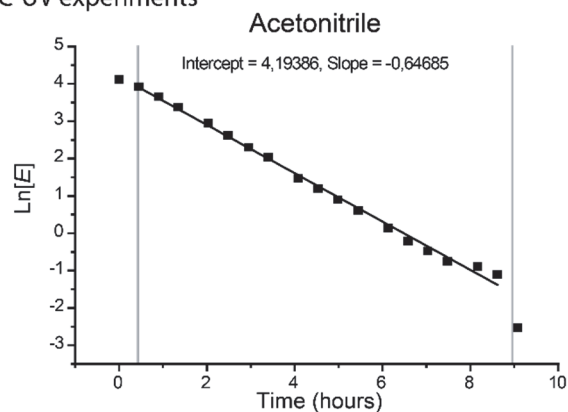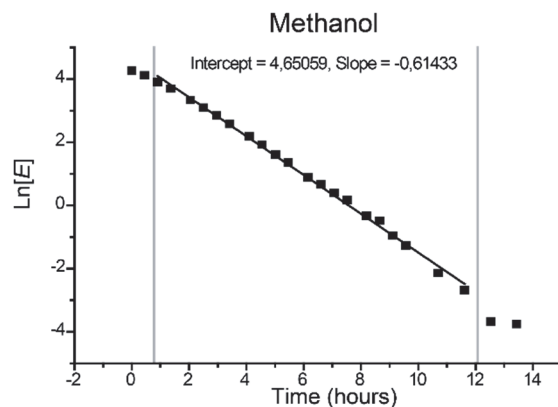

b) IMS-MS experiments

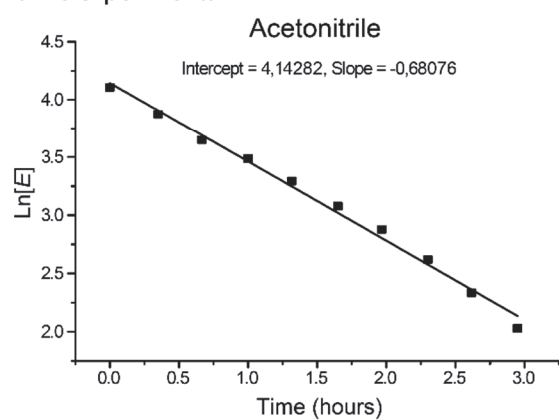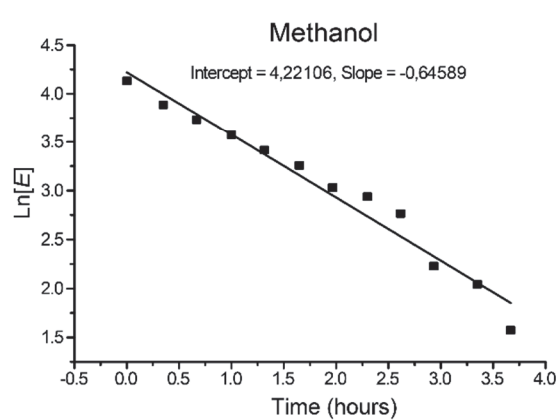

Supplement: d0an00048e1.pdf [file d0an00048e1.pdf]
